# Supplementary material for: Charge-transport properties of prototype molecular materials for organic electronics based on graphene nanoribbons
Source: Royal Society of Chemistry journal article supplement (doi:10.1039/b821748c), 2009-01-01
Supplement: b821748c.pdf [file b821748c.pdf]

–Supporting Information–

Charge-transport properties of prototype molecular materials for organic  
electronics based on graphene nanoribbons

J. C. Sancho-García\* and A. J. Pérez-Jiménez†  
Departamento de Química Física,  
Universidad de Alicante, E-03080 Alicante, Spain.

January 21, 2009

**Absolute energies and XYZ coordinates of the stationary states found<sup>1</sup>**

|                                                   |       |     |
|---------------------------------------------------|-------|-----|
| Isolated molecules in their $S_0$ state (B3LYP)   | ..... | S2  |
| Isolated molecules in their $S_0$ state (B2-PLYP) | ..... | S6  |
| Isolated molecules in their $D_0$ state (B3LYP)   | ..... | S10 |
| Isolated molecules in their $D_0$ state (B2-PLYP) | ..... | S14 |

---

\*E-mail: jc.sancho@ua.es

†E-mail: aj.perez@ua.es

<sup>1</sup>Note that we have chosen a cofacially stacked dimeric nanostructure to approximate the expected thin-films packing; the pair of molecules in its ground state are separated exactly by 3.5 Å and can be thus built directly from the XYZ coordinates of the monomers presented here.

Table S1: XYZ coordinates (in Å)  
for the fully optimized structure of  
circumbenzene at the B3LYP level<sup>a</sup>

|   |           |           |          |
|---|-----------|-----------|----------|
| C | 1.011219  | 1.011219  | 0.000000 |
| C | 1.379873  | -0.369683 | 0.000000 |
| C | 0.369683  | -1.379873 | 0.000000 |
| C | -1.011219 | -1.011219 | 0.000000 |
| C | -1.379873 | 0.369683  | 0.000000 |
| C | -0.369683 | 1.379873  | 0.000000 |
| C | 2.017209  | 2.017209  | 0.000000 |
| C | 3.386435  | 1.618846  | 0.000000 |
| C | 3.740802  | 0.291334  | 0.000000 |
| C | 2.754644  | -0.737282 | 0.000000 |
| C | 3.093564  | -2.121695 | 0.000000 |
| C | 2.121695  | -3.093564 | 0.000000 |
| C | 0.737282  | -2.754644 | 0.000000 |
| C | -0.291334 | -3.740802 | 0.000000 |
| C | -1.618846 | -3.386435 | 0.000000 |
| C | -2.017209 | -2.017209 | 0.000000 |
| C | -3.386435 | -1.618846 | 0.000000 |
| C | -3.740802 | -0.291334 | 0.000000 |
| C | -2.754644 | 0.737282  | 0.000000 |
| C | -3.093564 | 2.121695  | 0.000000 |
| C | -2.121695 | 3.093564  | 0.000000 |
| C | -0.737282 | 2.754644  | 0.000000 |
| C | 0.291334  | 3.740802  | 0.000000 |
| C | 1.618846  | 3.386435  | 0.000000 |
| H | 2.393191  | 4.157464  | 0.000000 |
| H | 4.157464  | 2.393191  | 0.000000 |
| H | 4.795418  | 0.004989  | 0.000000 |
| H | 4.149652  | -2.402529 | 0.000000 |
| H | 2.402529  | -4.149652 | 0.000000 |
| H | -0.004989 | -4.795418 | 0.000000 |
| H | -2.393191 | -4.157464 | 0.000000 |
| H | -4.157464 | -2.393191 | 0.000000 |
| H | -4.795418 | -0.004989 | 0.000000 |
| H | -4.149652 | 2.402529  | 0.000000 |
| H | -2.402529 | 4.149652  | 0.000000 |
| H | 0.004989  | 4.795418  | 0.000000 |

<sup>a</sup> Final energy (in a.u.): -921.401712049.

Table S2: XYZ coordinates (in Å)  
for the fully optimized structure  
of circumnaphthalene at the B3LYP  
level<sup>a</sup>

|   |           |           |          |
|---|-----------|-----------|----------|
| C | -0.718214 | 0.000000  | 0.000000 |
| C | -1.426973 | 1.229901  | 0.000000 |
| C | -0.714205 | 2.467916  | 0.000000 |
| C | -1.424984 | 3.701744  | 0.000000 |
| C | -0.691050 | 4.913119  | 0.000000 |
| C | -2.859677 | 3.670042  | 0.000000 |
| C | -3.545191 | 2.487754  | 0.000000 |
| C | -2.860400 | 1.226009  | 0.000000 |
| C | -3.540880 | 0.000000  | 0.000000 |
| C | -2.860400 | -1.226009 | 0.000000 |
| C | -3.545191 | -2.487754 | 0.000000 |
| C | -2.859677 | -3.670042 | 0.000000 |
| C | -1.424984 | -3.701744 | 0.000000 |
| C | -1.426973 | -1.229901 | 0.000000 |
| C | -0.691050 | -4.913119 | 0.000000 |
| C | -0.714205 | -2.467916 | 0.000000 |
| C | 0.691050  | -4.913119 | 0.000000 |
| C | 0.714205  | -2.467916 | 0.000000 |
| C | 0.718214  | 0.000000  | 0.000000 |
| C | 0.714205  | 2.467916  | 0.000000 |
| C | 0.691050  | 4.913119  | 0.000000 |
| C | 1.424984  | -3.701744 | 0.000000 |
| C | 1.426973  | -1.229901 | 0.000000 |
| C | 1.426973  | 1.229901  | 0.000000 |
| C | 1.424984  | 3.701744  | 0.000000 |
| C | 2.859677  | -3.670042 | 0.000000 |
| C | 2.860400  | -1.226009 | 0.000000 |
| C | 2.860400  | 1.226009  | 0.000000 |
| C | 2.859677  | 3.670042  | 0.000000 |
| C | 3.545191  | -2.487754 | 0.000000 |
| C | 3.540880  | 0.000000  | 0.000000 |
| C | 3.545191  | 2.487754  | 0.000000 |
| H | -4.634271 | 0.000000  | 0.000000 |
| H | -4.637912 | 2.485060  | 0.000000 |
| H | -4.637912 | -2.485060 | 0.000000 |
| H | -3.400858 | 4.619411  | 0.000000 |
| H | -3.400858 | -4.619411 | 0.000000 |
| H | -1.237317 | 5.859539  | 0.000000 |
| H | -1.237317 | -5.859539 | 0.000000 |
| H | 1.237317  | -5.859539 | 0.000000 |
| H | 3.400858  | -4.619411 | 0.000000 |
| H | 4.637912  | -2.485060 | 0.000000 |
| H | 4.634271  | 0.000000  | 0.000000 |
| H | 4.637912  | 2.485060  | 0.000000 |
| H | 3.400858  | 4.619411  | 0.000000 |
| H | 1.237317  | 5.859539  | 0.000000 |

<sup>a</sup> Final energy (in a.u.): -1227.353054366.

Table S3: XYZ coordinates (in Å)  
 for the fully optimized structure  
 of circumanthracene at the B3LYP  
 level<sup>a</sup>

|   |           |           |          |
|---|-----------|-----------|----------|
| C | 3.546097  | 2.487707  | 0.000000 |
| C | 2.861824  | 1.220979  | 0.000000 |
| C | 1.421674  | 1.226825  | 0.000000 |
| C | 0.710922  | 2.462936  | 0.000000 |
| C | 1.422412  | 3.699275  | 0.000000 |
| C | 2.860780  | 3.666812  | 0.000000 |
| C | 0.712807  | -0.000433 | 0.000000 |
| C | -0.723979 | 0.000746  | 0.000000 |
| C | -1.430819 | 1.229137  | 0.000000 |
| C | -0.718010 | 2.464086  | 0.000000 |
| C | -2.870983 | 1.225683  | 0.000000 |
| C | -3.551823 | 0.010143  | 0.000000 |
| C | -2.871932 | -1.229934 | 0.000000 |
| C | -1.433507 | -1.231128 | 0.000000 |
| C | 1.420299  | -1.233461 | 0.000000 |
| C | 0.710768  | -2.465338 | 0.000000 |
| C | -0.726020 | -2.464155 | 0.000000 |
| C | -3.553198 | 2.493525  | 0.000000 |
| C | -2.865879 | 3.671459  | 0.000000 |
| C | -1.427469 | 3.701542  | 0.000000 |
| C | 0.692108  | 4.906273  | 0.000000 |
| C | -0.695176 | 4.907323  | 0.000000 |
| C | -1.434873 | -3.691417 | 0.000000 |
| C | -2.875026 | -3.685593 | 0.000000 |
| C | -3.553799 | -2.468967 | 0.000000 |
| C | 1.417597  | -3.693729 | 0.000000 |
| C | 0.704808  | -4.928690 | 0.000000 |
| C | -0.724129 | -4.927533 | 0.000000 |
| C | 2.858723  | -1.234668 | 0.000000 |
| C | 3.538611  | -2.474755 | 0.000000 |
| C | 2.857759  | -3.690284 | 0.000000 |
| C | 3.540603  | 0.004354  | 0.000000 |
| H | -4.645039 | 0.010949  | 0.000000 |
| H | -4.645866 | 2.492750  | 0.000000 |
| H | -4.647020 | -2.467909 | 0.000000 |
| H | -3.404097 | 4.622513  | 0.000000 |
| H | -1.239085 | 5.855066  | 0.000000 |
| C | -1.435645 | -6.163857 | 0.000000 |
| C | 1.414258  | -6.166141 | 0.000000 |
| H | 4.631827  | -2.475522 | 0.000000 |
| H | 4.633822  | 0.003353  | 0.000000 |
| H | 4.638765  | 2.485112  | 0.000000 |
| H | 3.400610  | 4.616950  | 0.000000 |
| H | 1.237514  | 5.853150  | 0.000000 |
| C | 2.852681  | -6.136063 | 0.000000 |
| C | 0.681961  | -7.371907 | 0.000000 |
| H | 3.390876  | -7.087129 | 0.000000 |
| C | 3.539987  | -4.958125 | 0.000000 |
| H | 4.632656  | -4.957337 | 0.000000 |
| C | -0.705336 | -7.370844 | 0.000000 |
| C | -2.874017 | -6.131410 | 0.000000 |
| H | -1.250643 | -8.317779 | 0.000000 |
| H | 1.225774  | -8.319705 | 0.000000 |
| C | -3.559331 | -4.952307 | 0.000000 |
| H | -3.413775 | -7.081588 | 0.000000 |
| H | -4.651998 | -4.949650 | 0.000000 |

<sup>a</sup> Final energy (in a.u.): -1533.298606004.

Table S4: XYZ coordinates (in Å) for  
the fully optimized structure of cir-  
cumtetracene at the B3LYP level<sup>a</sup>

|   |           |            |          |
|---|-----------|------------|----------|
| C | -3.569345 | -4.921196  | 0.000000 |
| C | -2.884837 | -3.676558  | 0.000000 |
| C | -1.441918 | -3.681102  | 0.000000 |
| C | -0.736234 | -4.915424  | 0.000000 |
| C | -1.447890 | -6.142496  | 0.000000 |
| C | -3.563202 | -2.445206  | 0.000000 |
| C | -2.878016 | -1.217612  | 0.000000 |
| C | -1.435123 | -1.221035  | 0.000000 |
| C | -0.730002 | -2.453019  | 0.000000 |
| C | -0.722605 | 0.009330   | 0.000000 |
| C | -1.427381 | 1.240314   | 0.000000 |
| C | -2.870413 | 1.240033   | 0.000000 |
| C | -3.555494 | 0.030808   | 0.000000 |
| C | -0.712280 | 2.471168   | 0.000000 |
| C | 0.717541  | 2.467206   | 0.000000 |
| C | 1.425800  | 1.232403   | 0.000000 |
| C | 0.714196  | 0.005348   | 0.000000 |
| C | 1.431182  | 3.704981   | 0.000000 |
| C | 2.870465  | 3.670617   | 0.000000 |
| C | 3.555100  | 2.492517   | 0.000000 |
| C | 2.868806  | 1.224125   | 0.000000 |
| C | 1.419878  | -1.228943  | 0.000000 |
| C | 2.862806  | -1.233524  | 0.000000 |
| C | 3.547190  | 0.011121   | 0.000000 |
| C | -1.419047 | 3.712879   | 0.000000 |
| C | -0.685740 | 4.914516   | 0.000000 |
| C | 0.704549  | 4.910664   | 0.000000 |
| C | 0.707927  | -2.456992  | 0.000000 |
| C | -3.549662 | 2.512211   | 0.000000 |
| C | -2.858499 | 3.686492   | 0.000000 |
| C | 3.541172  | -2.464909  | 0.000000 |
| C | 2.855950  | -3.692457  | 0.000000 |
| C | 1.413033  | -3.688971  | 0.000000 |
| C | 0.700570  | -4.919369  | 0.000000 |
| C | 3.533388  | -4.940920  | 0.000000 |
| C | 2.848364  | -6.150150  | 0.000000 |
| C | 1.405309  | -6.150329  | 0.000000 |
| C | 0.690190  | -7.381246  | 0.000000 |
| H | -4.648575 | 0.034816   | 0.000000 |
| H | -4.642280 | 2.514506   | 0.000000 |
| H | -4.656167 | -2.441933  | 0.000000 |
| H | -3.393101 | 4.639639   | 0.000000 |
| H | -1.226818 | 5.863871   | 0.000000 |
| H | 4.634138  | -2.467739  | 0.000000 |
| H | 4.640276  | 0.009077   | 0.000000 |
| H | 4.647715  | 2.488745   | 0.000000 |
| H | 3.410344  | 4.620784   | 0.000000 |
| H | 1.250883  | 5.857004   | 0.000000 |
| H | 4.626471  | -4.944548  | 0.000000 |
| C | 1.397111  | -8.622931  | 0.000000 |
| H | -4.662413 | -4.918820  | 0.000000 |
| C | 0.663837  | -9.824511  | 0.000000 |
| C | 2.836525  | -8.596558  | 0.000000 |
| H | 1.204595  | -10.774038 | 0.000000 |
| C | -0.726560 | -9.820616  | 0.000000 |
| H | -1.272686 | -10.767085 | 0.000000 |
| C | -1.453270 | -8.615072  | 0.000000 |
| C | 3.527719  | -7.422299  | 0.000000 |
| H | 3.371184  | -9.549671  | 0.000000 |
| H | 4.620327  | -7.424794  | 0.000000 |
| C | -0.739542 | -7.377205  | 0.000000 |
| C | -2.892464 | -8.580544  | 0.000000 |
| H | -3.432607 | -9.530579  | 0.000000 |
| C | -3.577263 | -7.402467  | 0.000000 |
| C | -2.890887 | -6.134085  | 0.000000 |
| H | -4.669859 | -7.399181  | 0.000000 |

<sup>a</sup> Final energy (in a.u.): -1839.241237072.

Table S5: XYZ coordinates (in Å)  
for the fully optimized structure  
of circumbenzene at the B2-PLYP  
level<sup>a</sup>

|   |           |           |          |
|---|-----------|-----------|----------|
| C | 1.010840  | 1.010840  | 0.000000 |
| C | 1.379919  | -0.369723 | 0.000000 |
| C | 0.369723  | -1.379919 | 0.000000 |
| C | -1.010840 | -1.010839 | 0.000000 |
| C | -1.379919 | 0.369723  | 0.000000 |
| C | -0.369723 | 1.379919  | 0.000000 |
| C | 2.017282  | 2.017282  | 0.000000 |
| C | 3.386766  | 1.620102  | 0.000000 |
| C | 3.742264  | 0.290354  | 0.000000 |
| C | 2.755107  | -0.737778 | 0.000000 |
| C | 3.095395  | -2.122094 | 0.000000 |
| C | 2.122094  | -3.095395 | 0.000000 |
| C | 0.737778  | -2.755107 | 0.000000 |
| C | -0.290354 | -3.742264 | 0.000000 |
| C | -1.620102 | -3.386766 | 0.000000 |
| C | -2.017282 | -2.017282 | 0.000000 |
| C | -3.386766 | -1.620102 | 0.000000 |
| C | -3.742264 | -0.290354 | 0.000000 |
| C | -2.755107 | 0.737778  | 0.000000 |
| C | -3.095395 | 2.122094  | 0.000000 |
| C | -2.122094 | 3.095395  | 0.000000 |
| C | -0.737778 | 2.755107  | 0.000000 |
| C | 0.290354  | 3.742264  | 0.000000 |
| C | 1.620102  | 3.386766  | 0.000000 |
| H | 2.394298  | 4.156989  | 0.000000 |
| H | 4.156989  | 2.394297  | 0.000000 |
| H | 4.796221  | 0.004227  | 0.000000 |
| H | 4.150932  | -2.402328 | 0.000000 |
| H | 2.402328  | -4.150932 | 0.000000 |
| H | -0.004227 | -4.796221 | 0.000000 |
| H | -2.394297 | -4.156989 | 0.000000 |
| H | -4.156989 | -2.394298 | 0.000000 |
| H | -4.796221 | -0.004227 | 0.000000 |
| H | -4.150932 | 2.402328  | 0.000000 |
| H | -2.402328 | 4.150932  | 0.000000 |
| H | 0.004227  | 4.796221  | 0.000000 |

<sup>a</sup> Final energy (in a.u.): -921.255756454.

Table S6: XYZ coordinates (in Å)  
for the fully optimized structure of  
circumnaphthalene at the B2-PLYP  
level<sup>a</sup>

|   |           |           |          |
|---|-----------|-----------|----------|
| C | -0.717442 | 0.000000  | 0.000000 |
| C | -1.427400 | 1.230429  | 0.000000 |
| C | -0.714411 | 2.467567  | 0.000000 |
| C | -1.425395 | 3.701954  | 0.000000 |
| C | -0.691979 | 4.914384  | 0.000000 |
| C | -2.859431 | 3.671833  | 0.000000 |
| C | -3.546989 | 2.487194  | 0.000000 |
| C | -2.860964 | 1.226493  | 0.000000 |
| C | -3.543723 | 0.000000  | 0.000000 |
| C | -2.860964 | -1.226493 | 0.000000 |
| C | -3.546989 | -2.487194 | 0.000000 |
| C | -2.859431 | -3.671833 | 0.000000 |
| C | -1.425395 | -3.701954 | 0.000000 |
| C | -1.427400 | -1.230429 | 0.000000 |
| C | -0.691979 | -4.914384 | 0.000000 |
| C | -0.714411 | -2.467566 | 0.000000 |
| C | 0.691979  | -4.914384 | 0.000000 |
| C | 0.714412  | -2.467566 | 0.000000 |
| C | 0.717442  | 0.000000  | 0.000000 |
| C | 0.714412  | 2.467567  | 0.000000 |
| C | 0.691978  | 4.914384  | 0.000000 |
| C | 1.425395  | -3.701954 | 0.000000 |
| C | 1.427400  | -1.230429 | 0.000000 |
| C | 1.427400  | 1.230429  | 0.000000 |
| C | 1.425395  | 3.701954  | 0.000000 |
| C | 2.859431  | -3.671833 | 0.000000 |
| C | 2.860965  | -1.226493 | 0.000000 |
| C | 2.860965  | 1.226493  | 0.000000 |
| C | 2.859431  | 3.671833  | 0.000000 |
| C | 3.546989  | -2.487194 | 0.000000 |
| C | 3.543723  | 0.000000  | 0.000000 |
| C | 3.546989  | 2.487194  | 0.000000 |
| H | -4.636772 | 0.000000  | 0.000000 |
| H | -4.639051 | 2.484908  | 0.000000 |
| H | -4.639050 | -2.484909 | 0.000000 |
| H | -3.400245 | 4.620640  | 0.000000 |
| H | -3.400244 | -4.620640 | 0.000000 |
| H | -1.238392 | 5.859974  | 0.000000 |
| H | -1.238392 | -5.859974 | 0.000000 |
| H | 1.238391  | -5.859974 | 0.000000 |
| H | 3.400244  | -4.620640 | 0.000000 |
| H | 4.639050  | -2.484909 | 0.000000 |
| H | 4.636773  | 0.000000  | 0.000000 |
| H | 4.639051  | 2.484909  | 0.000000 |
| H | 3.400244  | 4.620640  | 0.000000 |
| H | 1.238391  | 5.859974  | 0.000000 |

<sup>a</sup> Final energy (in a.u.): -1227.166766562.

Table S7: XYZ coordinates (in Å)  
 for the fully optimized structure of  
 circumanthracene at the B2-PLYP  
 level<sup>a</sup>

|   |           |           |          |
|---|-----------|-----------|----------|
| C | 3.547422  | 2.486976  | 0.000000 |
| C | 2.861723  | 1.222110  | 0.000000 |
| C | 1.422426  | 1.228008  | 0.000000 |
| C | 0.711363  | 2.463012  | 0.000000 |
| C | 1.422962  | 3.699786  | 0.000000 |
| C | 2.860128  | 3.669047  | 0.000000 |
| C | 0.711968  | -0.000810 | 0.000000 |
| C | -0.723146 | 0.000370  | 0.000000 |
| C | -1.431581 | 1.230339  | 0.000000 |
| C | -0.718471 | 2.464176  | 0.000000 |
| C | -2.870888 | 1.226825  | 0.000000 |
| C | -3.554445 | 0.009842  | 0.000000 |
| C | -2.872907 | -1.229932 | 0.000000 |
| C | -1.433650 | -1.231128 | 0.000000 |
| C | 1.420438  | -1.233468 | 0.000000 |
| C | 0.709934  | -2.464966 | 0.000000 |
| C | -0.725180 | -2.463786 | 0.000000 |
| C | -3.554521 | 2.492811  | 0.000000 |
| C | -2.865244 | 3.673725  | 0.000000 |
| C | -1.428036 | 3.702092  | 0.000000 |
| C | 0.692822  | 4.908316  | 0.000000 |
| C | -0.695905 | 4.909413  | 0.000000 |
| C | -1.435636 | -3.692604 | 0.000000 |
| C | -2.874934 | -3.686709 | 0.000000 |
| C | -3.556455 | -2.468625 | 0.000000 |
| C | 1.418367  | -3.694935 | 0.000000 |
| C | 0.705260  | -4.928774 | 0.000000 |
| C | -0.724574 | -4.927609 | 0.000000 |
| C | 2.859695  | -1.234666 | 0.000000 |
| C | 3.541233  | -2.474442 | 0.000000 |
| C | 2.857675  | -3.691423 | 0.000000 |
| C | 3.543245  | 0.004024  | 0.000000 |
| H | -4.647450 | 0.011091  | 0.000000 |
| H | -4.646557 | 2.492019  | 0.000000 |
| H | -4.649463 | -2.468057 | 0.000000 |
| H | -3.403162 | 4.624175  | 0.000000 |
| H | -1.240070 | 5.856293  | 0.000000 |
| C | -1.436179 | -6.164380 | 0.000000 |
| C | 1.414826  | -6.166690 | 0.000000 |
| H | 4.634238  | -2.475679 | 0.000000 |
| H | 4.636253  | 0.003471  | 0.000000 |
| H | 4.639456  | 2.484377  | 0.000000 |
| H | 3.399639  | 4.618592  | 0.000000 |
| H | 1.238515  | 5.854313  | 0.000000 |
| C | 2.852036  | -6.138324 | 0.000000 |
| C | 0.682691  | -7.374006 | 0.000000 |
| H | 3.389945  | -7.088778 | 0.000000 |
| C | 3.541310  | -4.957409 | 0.000000 |
| H | 4.633345  | -4.956613 | 0.000000 |
| C | -0.706039 | -7.372906 | 0.000000 |
| C | -2.873347 | -6.133643 | 0.000000 |
| H | -1.251704 | -8.318920 | 0.000000 |
| H | 1.226829  | -8.320902 | 0.000000 |
| C | -3.560638 | -4.951574 | 0.000000 |
| H | -3.412838 | -7.083200 | 0.000000 |
| H | -4.652672 | -4.948956 | 0.000000 |

<sup>a</sup> Final energy (in a.u.): -1533.071999865.

Table S8: XYZ coordinates (in Å) for  
the fully optimized structure of cir-  
cumbutetracene at the B2-PLYP level<sup>a</sup>

|   |           |            |          |
|---|-----------|------------|----------|
| C | -3.570324 | -4.920105  | 0.000000 |
| C | -2.884902 | -3.677452  | 0.000000 |
| C | -1.441679 | -3.682150  | 0.000000 |
| C | -0.735541 | -4.915009  | 0.000000 |
| C | -1.448748 | -6.144469  | 0.000000 |
| C | -3.564880 | -2.445164  | 0.000000 |
| C | -2.878082 | -1.216660  | 0.000000 |
| C | -1.434854 | -1.219963  | 0.000000 |
| C | -0.728474 | -2.453025  | 0.000000 |
| C | -0.721888 | 0.008958   | 0.000000 |
| C | -1.428266 | 1.242353   | 0.000000 |
| C | -2.869290 | 1.242005   | 0.000000 |
| C | -3.556600 | 0.029774   | 0.000000 |
| C | -0.712915 | 2.472190   | 0.000000 |
| C | 0.718176  | 2.468222   | 0.000000 |
| C | 1.426696  | 1.234437   | 0.000000 |
| C | 0.713490  | 0.004978   | 0.000000 |
| C | 1.431831  | 3.705898   | 0.000000 |
| C | 2.869393  | 3.673291   | 0.000000 |
| C | 3.555508  | 2.491371   | 0.000000 |
| C | 2.867696  | 1.226099   | 0.000000 |
| C | 1.419631  | -1.227878  | 0.000000 |
| C | 2.862854  | -1.232578  | 0.000000 |
| C | 3.548272  | 0.010074   | 0.000000 |
| C | -1.419693 | 3.713806   | 0.000000 |
| C | -0.685979 | 4.917687   | 0.000000 |
| C | 0.704804  | 4.913830   | 0.000000 |
| C | 0.706423  | -2.457003  | 0.000000 |
| C | -3.550073 | 2.511073   | 0.000000 |
| C | -2.857415 | 3.689170   | 0.000000 |
| C | 3.542830  | -2.464872  | 0.000000 |
| C | 2.856030  | -3.693369  | 0.000000 |
| C | 1.412802  | -3.690063  | 0.000000 |
| C | 0.699839  | -4.918989  | 0.000000 |
| C | 3.534550  | -4.939806  | 0.000000 |
| C | 2.847243  | -6.152036  | 0.000000 |
| C | 1.406217  | -6.152384  | 0.000000 |
| C | 0.690865  | -7.382221  | 0.000000 |
| H | -4.649559 | 0.034026   | 0.000000 |
| H | -4.642101 | 2.513023   | 0.000000 |
| H | -4.657804 | -2.442112  | 0.000000 |
| H | -3.392243 | 4.641418   | 0.000000 |
| H | -1.227520 | 5.866104   | 0.000000 |
| H | 4.635755  | -2.467879  | 0.000000 |
| H | 4.641239  | 0.008266   | 0.000000 |
| H | 4.647529  | 2.487264   | 0.000000 |
| H | 3.409492  | 4.622558   | 0.000000 |
| H | 1.251599  | 5.859229   | 0.000000 |
| H | 4.627509  | -4.944019  | 0.000000 |
| C | 1.397648  | -8.623837  | 0.000000 |
| H | -4.663290 | -4.918264  | 0.000000 |
| C | 0.663936  | -9.827714  | 0.000000 |
| C | 2.835369  | -8.599199  | 0.000000 |
| H | 1.205439  | -10.776153 | 0.000000 |
| C | -0.726851 | -9.823859  | 0.000000 |
| H | -1.273615 | -10.769275 | 0.000000 |
| C | -1.453881 | -8.615935  | 0.000000 |
| C | 3.528028  | -7.421101  | 0.000000 |
| H | 3.370201  | -9.551444  | 0.000000 |
| H | 4.620056  | -7.423065  | 0.000000 |
| C | -0.740226 | -7.378254  | 0.000000 |
| C | -2.891440 | -8.583320  | 0.000000 |
| H | -3.431572 | -9.532569  | 0.000000 |
| C | -3.577556 | -7.401399  | 0.000000 |
| C | -2.889750 | -6.136128  | 0.000000 |
| H | -4.669578 | -7.397342  | 0.000000 |

<sup>a</sup> Final energy (in a.u.): -1838.974802720.

Table S9: XYZ coordinates (in Å)  
for the fully optimized structure of  
circumbenzene at the B3LYP level<sup>a</sup>

|   |           |           |          |
|---|-----------|-----------|----------|
| C | 1.419983  | 0.000000  | 0.000000 |
| C | -1.419983 | 0.000000  | 0.000000 |
| C | 0.709230  | -1.234190 | 0.000000 |
| C | -0.709231 | 1.234190  | 0.000000 |
| C | 0.709230  | 1.234190  | 0.000000 |
| C | -0.709231 | -1.234190 | 0.000000 |
| C | 1.426349  | -2.476561 | 0.000000 |
| C | -1.426349 | 2.476562  | 0.000000 |
| C | 1.426349  | 2.476561  | 0.000000 |
| C | -1.426349 | -2.476561 | 0.000000 |
| C | 0.682732  | -3.708147 | 0.000000 |
| C | -0.682732 | 3.708147  | 0.000000 |
| C | 0.682732  | 3.708147  | 0.000000 |
| C | -0.682732 | -3.708147 | 0.000000 |
| C | 2.841272  | 0.000000  | 0.000000 |
| C | -2.841272 | 0.000000  | 0.000000 |
| C | 3.526746  | -1.244725 | 0.000000 |
| C | -3.526746 | 1.244725  | 0.000000 |
| C | 3.526746  | 1.244725  | 0.000000 |
| C | -3.526746 | -1.244725 | 0.000000 |
| C | 2.836834  | -2.449994 | 0.000000 |
| C | -2.836834 | 2.449994  | 0.000000 |
| C | 2.836834  | 2.449994  | 0.000000 |
| C | -2.836834 | -2.449994 | 0.000000 |
| H | 4.618980  | -1.246786 | 0.000000 |
| H | -4.618980 | 1.246786  | 0.000000 |
| H | 4.618980  | 1.246786  | 0.000000 |
| H | -4.618980 | -1.246786 | 0.000000 |
| H | 3.388834  | -3.391608 | 0.000000 |
| H | -3.388834 | 3.391608  | 0.000000 |
| H | 3.388834  | 3.391608  | 0.000000 |
| H | -3.388834 | -3.391608 | 0.000000 |
| H | 1.234658  | -4.649922 | 0.000000 |
| H | -1.234658 | 4.649922  | 0.000000 |
| H | 1.234658  | 4.649922  | 0.000000 |
| H | -1.234658 | -4.649922 | 0.000000 |

<sup>a</sup> Final energy (in a.u.): -921.148932110.

Table S10: XYZ coordinates (in Å) for the fully optimized structure of circumnaphthalene at the B3LYP level<sup>a</sup>

|   |           |           |          |
|---|-----------|-----------|----------|
| C | -0.711989 | 0.000000  | 0.000000 |
| C | -1.422499 | 1.234343  | 0.000000 |
| C | -0.712895 | 2.465628  | 0.000000 |
| C | -1.426654 | 3.701051  | 0.000000 |
| C | -0.686506 | 4.924003  | 0.000000 |
| C | -2.849649 | 3.675431  | 0.000000 |
| C | -3.539714 | 2.483517  | 0.000000 |
| C | -2.852035 | 1.232543  | 0.000000 |
| C | -3.534944 | 0.000000  | 0.000000 |
| C | -2.852035 | -1.232543 | 0.000000 |
| C | -3.539714 | -2.483517 | 0.000000 |
| C | -2.849649 | -3.675431 | 0.000000 |
| C | -1.426654 | -3.701051 | 0.000000 |
| C | -1.422499 | -1.234343 | 0.000000 |
| C | -0.686506 | -4.924003 | 0.000000 |
| C | -0.712895 | -2.465628 | 0.000000 |
| C | 0.686506  | -4.924002 | 0.000000 |
| C | 0.712895  | -2.465628 | 0.000000 |
| C | 0.711988  | 0.000000  | 0.000000 |
| C | 0.712895  | 2.465628  | 0.000000 |
| C | 0.686506  | 4.924003  | 0.000000 |
| C | 1.426654  | -3.701051 | 0.000000 |
| C | 1.422499  | -1.234343 | 0.000000 |
| C | 1.422499  | 1.234343  | 0.000000 |
| C | 1.426654  | 3.701051  | 0.000000 |
| C | 2.849649  | -3.675431 | 0.000000 |
| C | 2.852035  | -1.232543 | 0.000000 |
| C | 2.852035  | 1.232543  | 0.000000 |
| C | 2.849649  | 3.675431  | 0.000000 |
| C | 3.539714  | -2.483517 | 0.000000 |
| C | 3.534944  | 0.000000  | 0.000000 |
| C | 3.539714  | 2.483517  | 0.000000 |
| H | -4.627927 | 0.000000  | 0.000000 |
| H | -4.631661 | 2.484320  | 0.000000 |
| H | -4.631661 | -2.484320 | 0.000000 |
| H | -3.394368 | 4.621539  | 0.000000 |
| H | -3.394368 | -4.621539 | 0.000000 |
| H | -1.234401 | 5.868358  | 0.000000 |
| H | -1.234401 | -5.868357 | 0.000000 |
| H | 1.234401  | -5.868358 | 0.000000 |
| H | 3.394368  | -4.621539 | 0.000000 |
| H | 4.631661  | -2.484320 | 0.000000 |
| H | 4.627927  | 0.000000  | 0.000000 |
| H | 4.631661  | 2.484320  | 0.000000 |
| H | 3.394368  | 4.621539  | 0.000000 |
| H | 1.234401  | 5.868358  | 0.000000 |

<sup>a</sup> Final energy (in a.u.): -1227.124464781.

Table S11: XYZ coordinates (in Å) for the fully optimized structure of circumanthracene at the B3LYP level<sup>a</sup>

|   |           |           |          |
|---|-----------|-----------|----------|
| C | 3.543165  | 2.483818  | 0.000000 |
| C | 2.855120  | 1.227502  | 0.000000 |
| C | 1.420651  | 1.229305  | 0.000000 |
| C | 0.710745  | 2.461441  | 0.000000 |
| C | 1.423955  | 3.694776  | 0.000000 |
| C | 2.854034  | 3.668832  | 0.000000 |
| C | 0.709201  | -0.003441 | 0.000000 |
| C | -0.720389 | -0.002260 | 0.000000 |
| C | -1.429812 | 1.231629  | 0.000000 |
| C | -0.717838 | 2.462599  | 0.000000 |
| C | -2.864289 | 1.232222  | 0.000000 |
| C | -3.548225 | 0.006942  | 0.000000 |
| C | -2.865541 | -1.229941 | 0.000000 |
| C | -1.428095 | -1.231135 | 0.000000 |
| C | 1.414884  | -1.233459 | 0.000000 |
| C | 0.707177  | -2.462333 | 0.000000 |
| C | -0.722415 | -2.461152 | 0.000000 |
| C | -3.550285 | 2.489646  | 0.000000 |
| C | -2.859116 | 3.673483  | 0.000000 |
| C | -1.429009 | 3.697061  | 0.000000 |
| C | 0.687719  | 4.911650  | 0.000000 |
| C | -0.690766 | 4.912716  | 0.000000 |
| C | -1.433859 | -3.693900 | 0.000000 |
| C | -2.868326 | -3.692105 | 0.000000 |
| C | -3.550236 | -2.465771 | 0.000000 |
| C | 1.416596  | -3.696223 | 0.000000 |
| C | 0.704629  | -4.927199 | 0.000000 |
| C | -0.723954 | -4.926037 | 0.000000 |
| C | 2.852329  | -1.234661 | 0.000000 |
| C | 3.535013  | -2.471544 | 0.000000 |
| C | 2.851071  | -3.696821 | 0.000000 |
| C | 3.537026  | 0.001168  | 0.000000 |
| H | -4.641027 | 0.008302  | 0.000000 |
| H | -4.642143 | 2.490952  | 0.000000 |
| H | -4.643040 | -2.465322 | 0.000000 |
| H | -3.398654 | 4.622693  | 0.000000 |
| H | -1.235540 | 5.859019  | 0.000000 |
| C | -1.437176 | -6.159364 | 0.000000 |
| C | 1.415801  | -6.161656 | 0.000000 |
| H | 4.627815  | -2.472899 | 0.000000 |
| H | 4.629830  | 0.000730  | 0.000000 |
| H | 4.635027  | 2.483289  | 0.000000 |
| H | 3.395183  | 4.617123  | 0.000000 |
| H | 1.234006  | 5.857076  | 0.000000 |
| C | 2.845913  | -6.138082 | 0.000000 |
| C | 0.677552  | -7.377305 | 0.000000 |
| H | 3.385425  | -7.087307 | 0.000000 |
| C | 3.537073  | -4.954244 | 0.000000 |
| H | 4.628931  | -4.955538 | 0.000000 |
| C | -0.700937 | -7.376235 | 0.000000 |
| C | -2.867259 | -6.133430 | 0.000000 |
| H | -1.247185 | -8.321684 | 0.000000 |
| H | 1.222288  | -8.323629 | 0.000000 |
| C | -3.556384 | -4.948416 | 0.000000 |
| H | -3.408364 | -7.081745 | 0.000000 |
| H | -4.648246 | -4.947850 | 0.000000 |

<sup>a</sup> Final energy (in a.u.): -1533.086770949.

Table S12: XYZ coordinates (in Å)  
 for the fully optimized structure of  
 circumtetracene at the B3LYP level<sup>a</sup>

|   |           |            |          |
|---|-----------|------------|----------|
| C | -3.567392 | -4.916371  | 0.000000 |
| C | -2.879138 | -3.679752  | 0.000000 |
| C | -1.438113 | -3.682405  | 0.000000 |
| C | -0.734732 | -4.911630  | 0.000000 |
| C | -1.448691 | -6.141807  | 0.000000 |
| C | -3.560342 | -2.445217  | 0.000000 |
| C | -2.872332 | -1.214494  | 0.000000 |
| C | -1.431318 | -1.219767  | 0.000000 |
| C | -0.726707 | -2.453029  | 0.000000 |
| C | -0.721149 | 0.005525   | 0.000000 |
| C | -1.428220 | 1.239629   | 0.000000 |
| C | -2.865907 | 1.244480   | 0.000000 |
| C | -3.553630 | 0.025958   | 0.000000 |
| C | -0.712124 | 2.469417   | 0.000000 |
| C | 0.717356  | 2.465455   | 0.000000 |
| C | 1.426619  | 1.231713   | 0.000000 |
| C | 0.712707  | 0.001548   | 0.000000 |
| C | 1.432191  | 3.698143   | 0.000000 |
| C | 2.865984  | 3.669997   | 0.000000 |
| C | 3.554059  | 2.488705   | 0.000000 |
| C | 2.864307  | 1.228597   | 0.000000 |
| C | 1.416075  | -1.227656  | 0.000000 |
| C | 2.857122  | -1.230374  | 0.000000 |
| C | 3.545278  | 0.006284   | 0.000000 |
| C | -1.420114 | 3.706047   | 0.000000 |
| C | -0.681797 | 4.915694   | 0.000000 |
| C | 0.700591  | 4.911864   | 0.000000 |
| C | 0.704620  | -2.456988  | 0.000000 |
| C | -3.548660 | 2.508392   | 0.000000 |
| C | -2.854039 | 3.685847   | 0.000000 |
| C | 3.538325  | -2.464890  | 0.000000 |
| C | 2.850261  | -3.695607  | 0.000000 |
| C | 1.409233  | -3.690243  | 0.000000 |
| C | 0.699120  | -4.915568  | 0.000000 |
| C | 3.531536  | -4.936071  | 0.000000 |
| C | 2.843835  | -6.154624  | 0.000000 |
| C | 1.406167  | -6.149655  | 0.000000 |
| C | 0.690016  | -7.379484  | 0.000000 |
| H | -4.646220 | 0.029671   | 0.000000 |
| H | -4.640474 | 2.512178   | 0.000000 |
| H | -4.653072 | -2.442074  | 0.000000 |
| H | -3.388458 | 4.638100   | 0.000000 |
| H | -1.223138 | 5.864069   | 0.000000 |
| H | 4.631063  | -2.467808  | 0.000000 |
| H | 4.637878  | 0.003952   | 0.000000 |
| H | 4.645880  | 2.486428   | 0.000000 |
| H | 3.405672  | 4.619273   | 0.000000 |
| H | 1.247181  | 5.857224   | 0.000000 |
| H | 4.624133  | -4.939553  | 0.000000 |
| C | 1.398133  | -8.616071  | 0.000000 |
| H | -4.659972 | -4.913869  | 0.000000 |
| C | 0.659826  | -9.825667  | 0.000000 |
| C | 2.832049  | -8.595933  | 0.000000 |
| H | 1.200968  | -10.774153 | 0.000000 |
| C | -0.722609 | -9.821785  | 0.000000 |
| H | -1.269127 | -10.767194 | 0.000000 |
| C | -1.454266 | -8.608123  | 0.000000 |
| C | 3.526700  | -7.418485  | 0.000000 |
| H | 3.366484  | -9.548175  | 0.000000 |
| H | 4.618509  | -7.422355  | 0.000000 |
| C | -0.739388 | -7.375469  | 0.000000 |
| C | -2.887963 | -8.579894  | 0.000000 |
| H | -3.427870 | -9.529057  | 0.000000 |
| C | -3.576183 | -7.398593  | 0.000000 |
| C | -2.886387 | -6.138619  | 0.000000 |
| H | -4.667985 | -7.396632  | 0.000000 |

<sup>a</sup> Final energy (in a.u.): -1839.041556507.

Table S13: XYZ coordinates (in Å) for the fully optimized structure of circumbenzene at the B2-PLYP level<sup>a</sup>

|   |           |           |          |
|---|-----------|-----------|----------|
| C | 1.419833  | 0.000000  | 0.000000 |
| C | -1.419833 | 0.000000  | 0.000000 |
| C | 0.709258  | -1.234895 | 0.000000 |
| C | -0.709258 | 1.234895  | 0.000000 |
| C | 0.709258  | 1.234895  | 0.000000 |
| C | -0.709258 | -1.234895 | 0.000000 |
| C | 1.426376  | -2.476208 | 0.000000 |
| C | -1.426377 | 2.476208  | 0.000000 |
| C | 1.426376  | 2.476208  | 0.000000 |
| C | -1.426376 | -2.476208 | 0.000000 |
| C | 0.684544  | -3.707821 | 0.000000 |
| C | -0.684544 | 3.707821  | 0.000000 |
| C | 0.684544  | 3.707821  | 0.000000 |
| C | -0.684544 | -3.707821 | 0.000000 |
| C | 2.840045  | 0.000000  | 0.000000 |
| C | -2.840045 | 0.000000  | 0.000000 |
| C | 3.527543  | -1.244259 | 0.000000 |
| C | -3.527543 | 1.244259  | 0.000000 |
| C | 3.527543  | 1.244259  | 0.000000 |
| C | -3.527543 | -1.244259 | 0.000000 |
| C | 2.837946  | -2.450146 | 0.000000 |
| C | -2.837947 | 2.450146  | 0.000000 |
| C | 2.837946  | 2.450146  | 0.000000 |
| C | -2.837946 | -2.450146 | 0.000000 |
| H | 4.619248  | -1.244778 | 0.000000 |
| H | -4.619248 | 1.244778  | 0.000000 |
| H | 4.619248  | 1.244778  | 0.000000 |
| H | -4.619248 | -1.244777 | 0.000000 |
| H | 3.389376  | -3.391398 | 0.000000 |
| H | -3.389377 | 3.391398  | 0.000000 |
| H | 3.389376  | 3.391398  | 0.000000 |
| H | -3.389377 | -3.391398 | 0.000000 |
| H | 1.235959  | -4.649167 | 0.000000 |
| H | -1.235960 | 4.649166  | 0.000000 |
| H | 1.235959  | 4.649167  | 0.000000 |
| H | -1.235960 | -4.649166 | 0.000000 |

<sup>a</sup> Final energy (in a.u.): -920.997866174.

Table S14: XYZ coordinates (in Å)  
for the fully optimized structure of  
circumnaphthalene at the B2-PLYP  
level<sup>a</sup>

|   |           |           |          |
|---|-----------|-----------|----------|
| C | -0.711916 | 0.000000  | 0.000000 |
| C | -1.422464 | 1.233760  | 0.000000 |
| C | -0.712584 | 2.465799  | 0.000000 |
| C | -1.427088 | 3.700754  | 0.000000 |
| C | -0.688094 | 4.923638  | 0.000000 |
| C | -2.851053 | 3.675446  | 0.000000 |
| C | -3.541319 | 2.482848  | 0.000000 |
| C | -2.851177 | 1.231858  | 0.000000 |
| C | -3.534747 | 0.000000  | 0.000000 |
| C | -2.851177 | -1.231858 | 0.000000 |
| C | -3.541319 | -2.482847 | 0.000000 |
| C | -2.851053 | -3.675446 | 0.000000 |
| C | -1.427087 | -3.700754 | 0.000000 |
| C | -1.422464 | -1.233760 | 0.000000 |
| C | -0.688094 | -4.923638 | 0.000000 |
| C | -0.712584 | -2.465799 | 0.000000 |
| C | 0.688093  | -4.923638 | 0.000000 |
| C | 0.712585  | -2.465799 | 0.000000 |
| C | 0.711917  | 0.000000  | 0.000000 |
| C | 0.712585  | 2.465799  | 0.000000 |
| C | 0.688093  | 4.923638  | 0.000000 |
| C | 1.427087  | -3.700754 | 0.000000 |
| C | 1.422465  | -1.233760 | 0.000000 |
| C | 1.422464  | 1.233760  | 0.000000 |
| C | 1.427087  | 3.700754  | 0.000000 |
| C | 2.851053  | -3.675446 | 0.000000 |
| C | 2.851178  | -1.231858 | 0.000000 |
| C | 2.851178  | 1.231858  | 0.000000 |
| C | 2.851053  | 3.675447  | 0.000000 |
| C | 3.541319  | -2.482848 | 0.000000 |
| C | 3.534748  | 0.000000  | 0.000000 |
| C | 3.541319  | 2.482848  | 0.000000 |
| H | -4.627559 | 0.000000  | 0.000000 |
| H | -4.632712 | 2.482466  | 0.000000 |
| H | -4.632712 | -2.482466 | 0.000000 |
| H | -3.395414 | 4.621040  | 0.000000 |
| H | -3.395413 | -4.621040 | 0.000000 |
| H | -1.235597 | 5.867520  | 0.000000 |
| H | -1.235597 | -5.867520 | 0.000000 |
| H | 1.235595  | -5.867520 | 0.000000 |
| H | 3.395413  | -4.621040 | 0.000000 |
| H | 4.632712  | -2.482467 | 0.000000 |
| H | 4.627560  | 0.000000  | 0.000000 |
| H | 4.632712  | 2.482467  | 0.000000 |
| H | 3.395413  | 4.621040  | 0.000000 |
| H | 1.235596  | 5.867520  | 0.000000 |

<sup>a</sup> Final energy (in a.u.): -1226.932565382.

Table S15: XYZ coordinates (in Å)  
 for the fully optimized structure of  
 circumanthracene at the B2-PLYP  
 level<sup>a</sup>

|   |           |           |          |
|---|-----------|-----------|----------|
| C | 3.545267  | 2.482729  | 0.000000 |
| C | 2.855013  | 1.226135  | 0.000000 |
| C | 1.420935  | 1.228548  | 0.000000 |
| C | 0.710704  | 2.460618  | 0.000000 |
| C | 1.424767  | 3.694119  | 0.000000 |
| C | 2.855281  | 3.668610  | 0.000000 |
| C | 0.708482  | -0.003239 | 0.000000 |
| C | -0.719668 | -0.002064 | 0.000000 |
| C | -1.430091 | 1.230879  | 0.000000 |
| C | -0.717806 | 2.461777  | 0.000000 |
| C | -2.864177 | 1.230850  | 0.000000 |
| C | -3.548144 | 0.006700  | 0.000000 |
| C | -2.863675 | -1.229943 | 0.000000 |
| C | -1.427702 | -1.231135 | 0.000000 |
| C | 1.414490  | -1.233461 | 0.000000 |
| C | 0.706456  | -2.462533 | 0.000000 |
| C | -0.721694 | -2.461358 | 0.000000 |
| C | -3.552372 | 2.488565  | 0.000000 |
| C | -2.860378 | 3.673282  | 0.000000 |
| C | -1.429834 | 3.696422  | 0.000000 |
| C | 0.689116  | 4.911056  | 0.000000 |
| C | -0.692182 | 4.912137  | 0.000000 |
| C | -1.434146 | -3.693144 | 0.000000 |
| C | -2.868224 | -3.690733 | 0.000000 |
| C | -3.550168 | -2.465497 | 0.000000 |
| C | 1.416879  | -3.695475 | 0.000000 |
| C | 0.704594  | -4.926375 | 0.000000 |
| C | -0.723916 | -4.925215 | 0.000000 |
| C | 2.850463  | -1.234654 | 0.000000 |
| C | 3.534933  | -2.471298 | 0.000000 |
| C | 2.850965  | -3.695448 | 0.000000 |
| C | 3.536957  | 0.000899  | 0.000000 |
| H | -4.640847 | 0.007292  | 0.000000 |
| H | -4.643670 | 2.489234  | 0.000000 |
| H | -4.642871 | -2.464284 | 0.000000 |
| H | -3.399567 | 4.621969  | 0.000000 |
| H | -1.236645 | 5.857948  | 0.000000 |
| C | -1.437982 | -6.158714 | 0.000000 |
| C | 1.416622  | -6.161019 | 0.000000 |
| H | 4.627635  | -2.471888 | 0.000000 |
| H | 4.629660  | -0.000311 | 0.000000 |
| H | 4.636567  | 2.481576  | 0.000000 |
| H | 3.396065  | 4.616387  | 0.000000 |
| H | 1.235100  | 5.855987  | 0.000000 |
| C | 2.847168  | -6.137879 | 0.000000 |
| C | 0.678968  | -7.376732 | 0.000000 |
| H | 3.386348  | -7.086571 | 0.000000 |
| C | 3.539160  | -4.953162 | 0.000000 |
| H | 4.630458  | -4.953828 | 0.000000 |
| C | -0.702331 | -7.375649 | 0.000000 |
| C | -2.868497 | -6.133207 | 0.000000 |
| H | -1.248304 | -8.320587 | 0.000000 |
| H | 1.223419  | -8.322550 | 0.000000 |
| C | -3.558481 | -4.947326 | 0.000000 |
| H | -3.409269 | -7.080991 | 0.000000 |
| H | -4.649781 | -4.946162 | 0.000000 |

<sup>a</sup> Final energy (in a.u.): -1532.853631456.

Table S16: XYZ coordinates (in Å) for the fully optimized structure of circumtetracene at the B2-PLYP level<sup>a</sup>

|   |           |            |          |
|---|-----------|------------|----------|
| C | -3.566960 | -4.915572  | 0.000000 |
| C | -2.877233 | -3.678929  | 0.000000 |
| C | -1.437248 | -3.681832  | 0.000000 |
| C | -0.733882 | -4.911317  | 0.000000 |
| C | -1.449051 | -6.141071  | 0.000000 |
| C | -3.558566 | -2.445189  | 0.000000 |
| C | -2.870416 | -1.215243  | 0.000000 |
| C | -1.430433 | -1.220310  | 0.000000 |
| C | -0.725650 | -2.453031  | 0.000000 |
| C | -0.720259 | 0.005248   | 0.000000 |
| C | -1.428587 | 1.238946   | 0.000000 |
| C | -2.865995 | 1.242858   | 0.000000 |
| C | -3.553250 | 0.025219   | 0.000000 |
| C | -0.712481 | 2.468258   | 0.000000 |
| C | 0.717717  | 2.464292   | 0.000000 |
| C | 1.426994  | 1.231029   | 0.000000 |
| C | 0.711837  | 0.001277   | 0.000000 |
| C | 1.433183  | 3.697326   | 0.000000 |
| C | 2.866921  | 3.669568   | 0.000000 |
| C | 3.555628  | 2.486868   | 0.000000 |
| C | 2.864400  | 1.226970   | 0.000000 |
| C | 1.415204  | -1.228199  | 0.000000 |
| C | 2.855194  | -1.231121  | 0.000000 |
| C | 3.544892  | 0.005537   | 0.000000 |
| C | -1.421098 | 3.705240   | 0.000000 |
| C | -0.682795 | 4.915322   | 0.000000 |
| C | 0.701601  | 4.911484   | 0.000000 |
| C | 0.703587  | -2.456990  | 0.000000 |
| C | -3.550226 | 2.506571   | 0.000000 |
| C | -2.854969 | 3.685432   | 0.000000 |
| C | 3.536524  | -2.464862  | 0.000000 |
| C | 2.848357  | -3.694799  | 0.000000 |
| C | 1.408373  | -3.689704  | 0.000000 |
| C | 0.698216  | -4.915278  | 0.000000 |
| C | 3.531186  | -4.935264  | 0.000000 |
| C | 2.843943  | -6.152913  | 0.000000 |
| C | 1.406541  | -6.148973  | 0.000000 |
| C | 0.690422  | -7.378295  | 0.000000 |
| H | -4.645828 | 0.028232   | 0.000000 |
| H | -4.641538 | 2.509812   | 0.000000 |
| H | -4.651356 | -2.442114  | 0.000000 |
| H | -3.389233 | 4.637068   | 0.000000 |
| H | -1.224098 | 5.863095   | 0.000000 |
| H | 4.629314  | -2.467841  | 0.000000 |
| H | 4.637470  | 0.002495   | 0.000000 |
| H | 4.646941  | 2.484053   | 0.000000 |
| H | 3.406454  | 4.618227   | 0.000000 |
| H | 1.248152  | 5.856240   | 0.000000 |
| H | 4.623765  | -4.938172  | 0.000000 |
| C | 1.399073  | -8.615263  | 0.000000 |
| H | -4.659534 | -4.912456  | 0.000000 |
| C | 0.660769  | -9.825340  | 0.000000 |
| C | 2.832936  | -8.595465  | 0.000000 |
| H | 1.201983  | -10.773164 | 0.000000 |
| C | -0.723635 | -9.821502  | 0.000000 |
| H | -1.270138 | -10.766287 | 0.000000 |
| C | -1.455241 | -8.607367  | 0.000000 |
| C | 3.528205  | -7.416603  | 0.000000 |
| H | 3.367206  | -9.547098  | 0.000000 |
| H | 4.619514  | -7.419874  | 0.000000 |
| C | -0.739758 | -7.374320  | 0.000000 |
| C | -2.888950 | -8.579583  | 0.000000 |
| H | -3.428590 | -9.528184  | 0.000000 |
| C | -3.577692 | -7.396880  | 0.000000 |
| C | -2.886455 | -6.136999  | 0.000000 |
| H | -4.669002 | -7.394221  | 0.000000 |

<sup>a</sup> Final energy (in a.u.): -1838.767085137.
